# Supplementary material for: Solid state supramolecular assemblies of charged supermolecules (Na[2.2.2]cryptate)+ and anionic carboranes with host cyclotriveratrylene
Source: Royal Society of Chemistry journal article supplement (doi:10.1039/b009581h), 2001-01-01
Supplement: b009581h.doc [file b009581h.doc]

**SUPPLEMENTARY MATERIAL**

Synthesis

{(Na[2.2.2]cryptate)[CTV][Co(C2B9H11)2]}2(CH3CN) **5** : Na.**2** (19.1 mg, 0.055 mmol) and **4** (20.5 mg, 0.054 mmol) were mixed in water to give (Na[2.2.2]cryptate)[Co(C2B9H11)2] as a yellow powder (33.7 mg, 86 %) C22H58B18CoN2NaO6: calc. C 36.5, H 8.1, N 3.9; found C 36.5, H 8.1, N 3.8. (Na[2.2.2]cryptate)[Co(C2B9H11)2] (2.4 mg, 3.3 mol) and CTV (1.8 mg, 3.9 mol) were dissolved and mixed in hot CH3CN/ H2O and the solution cooled to give yellow-orange crystals of **5**. Crystals lost solvent in the atmosphere.

(Na[2.2.2]cryptate)[CTV](CHCl3)3[CB11H12] **6** : Cs.**3** (6.2 mg, 0.022 mmol) and **4** (8.5 mg, 0.022 mmol) were mixed in water to give (Cs[2.2.2]cryptate)[CB11H12] as a white powder (10.3 mg, 70 %). (Cs[2.2.2]cryptate)[CB11H12] (1.3 mg, 1.99 mol) and CTV (1.0 mg, 2.2 mol) were dissolved and mixed in CHCl3 and NaOH (0.3 ml of 0.01*M* solution in MeOH) added, and hexane vapours diffused into the mixture. Colourless crystals of **6** appeared after a day. Crystals lost solvent on exposure to the atmosphere.

***Discussion of structure solution and refinement of {(Na[2.2.2]cryptate)[CTV][Co(C2B9H11)2]}2(CH3CN)***

{(Na[2.2.2]cryptate)[CTV][Co(C2B9H11)2]}2(CH3CN) **5** crystallised as needles with the shortest edge 0.05mm, and were consequently weakly diffracting. Exposure time was set at 2 minutes per frame to try to overcome this. Larger crystals could be grown however showed an extremely high degree of internal flaws (mosaicity > 2°) and could not be used for data collection. The structure was solved in the noncentrosymmetric space group *P*21, and there were no indications of an incorrect space group assignment on the basis of the <E2-1> function or correlation matrix elements during the refinement (none > 0.5). The data could not be solved in the only possible centrosymmetric space group *P*21/*m*. Nevertheless a pseudo centre of symmetry exists within the structure, apparent between the CTV and cobalticarborane molecules and Na positions, but not the cryptate. The two cryptate molecules within the asymmetric unit have entirely different conformations, and orientations relative to other molecules in the structure, and they, and the presence of one molecule of solvent in the asymmetric unit, are responsible for the noncentrosymmetric nature of the structure. The structure could not be refined anisotropically with many C and O atoms becoming non-positive definite. These problems are attributed to a combination of the weak data and the pseudosymmetry and not an incorrect space group assignment. Notably the unsolvated complex (Na[2.2.2]cryptate)[CTV][Co(C2B9H11)2] which has similar unit cell parameters and overall structure to **5**, has a centrosymmetric (although severely disordered) structure but in space group *P*21/*n* and not *P*21/*m*. This structure will be fully reported in a subsequent full paper.
